# Supplementary material
Source: publisher figshare collection journal article supplement (https://frontiersin.figshare.com/ndownloader/files/25606688)
Supplement: Supplementary file 1 [file 25606688]

**Figure S2:** Individual genotypes for all 72 outlier SNPs in the large LD cluster. Each row is a SNP, and each column is an individual. Contigs with outlier SNPs are roughly ordered by the strength of their membership in the LD cluster. Yellow = major allele homozygote; orange = heterozygote; red = minor allele homozygote.

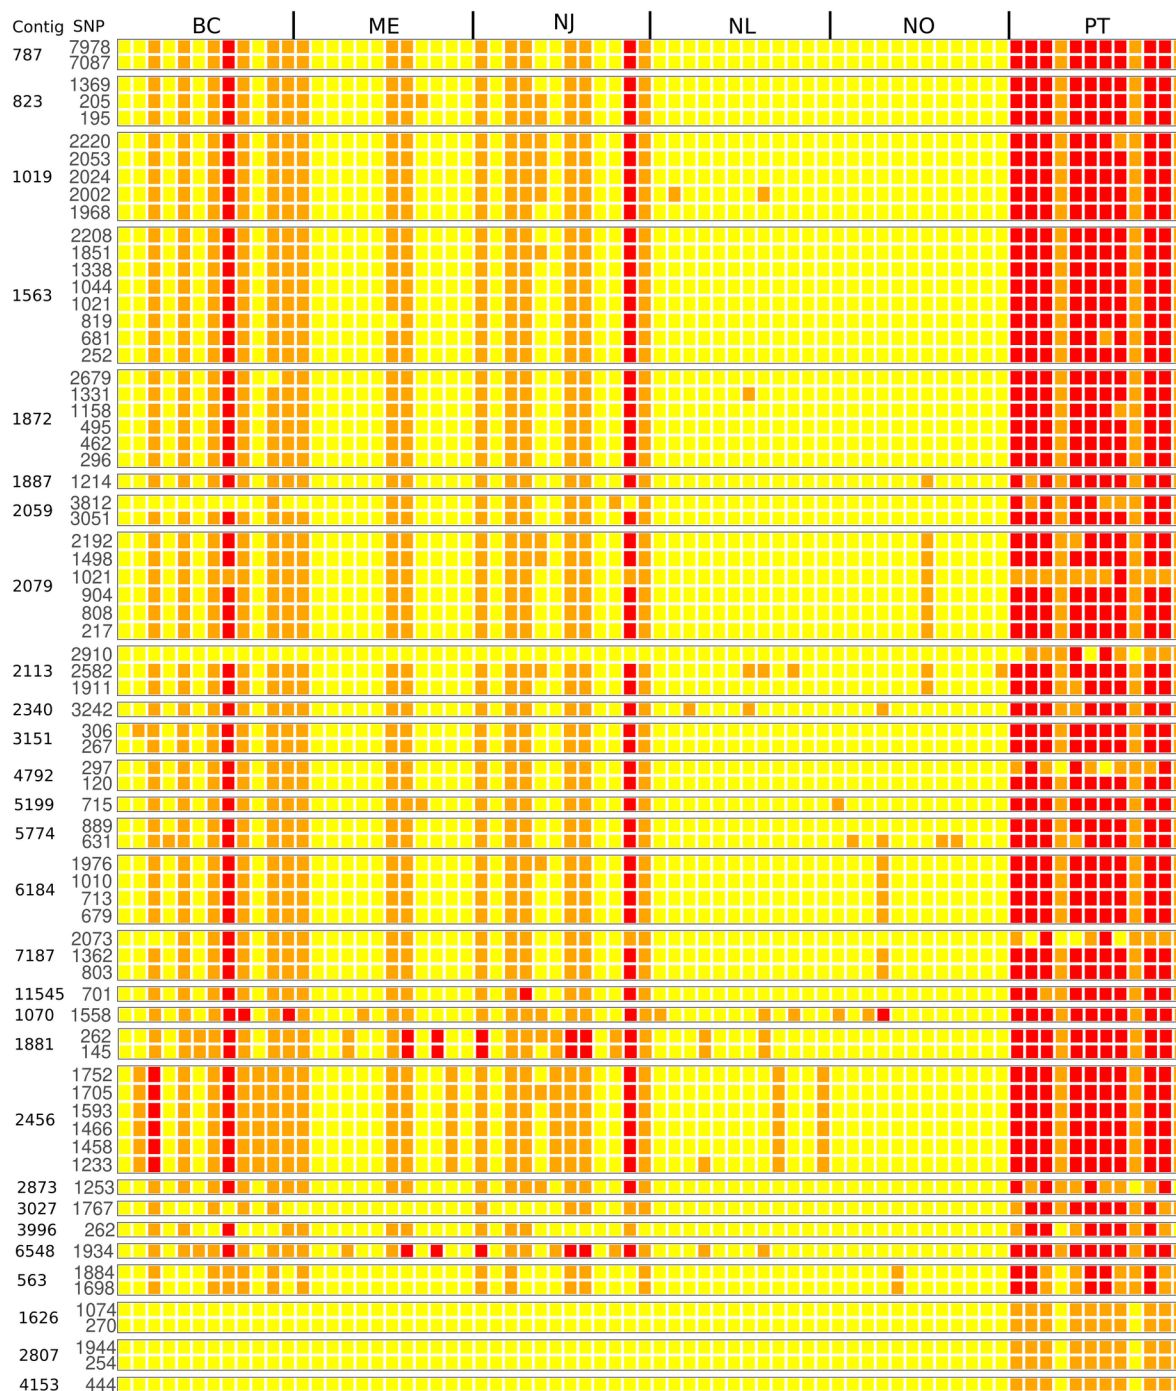

**Figure S3:** Relationship between minor allele frequency and temperature or physiology at outlier regions that were not top candidates for ongoing selection. A-D: Panels show the linear relationship between minor allele frequency and population-level cold tolerance or site latitude. E-P: Panels show the second-order polynomial relationship between minor allele frequency and population-level cold tolerance. Note that this polynomial relationship is used only to show approximate non-linear relationships between MAF and tolerance, and is not necessarily the best fit to the data. All panels: For each group of > 1 SNP, points and lines are shown for one representative SNP; all SNPs in these groups are in very strong LD ( $R^2 > 0.9$ ) with each other.

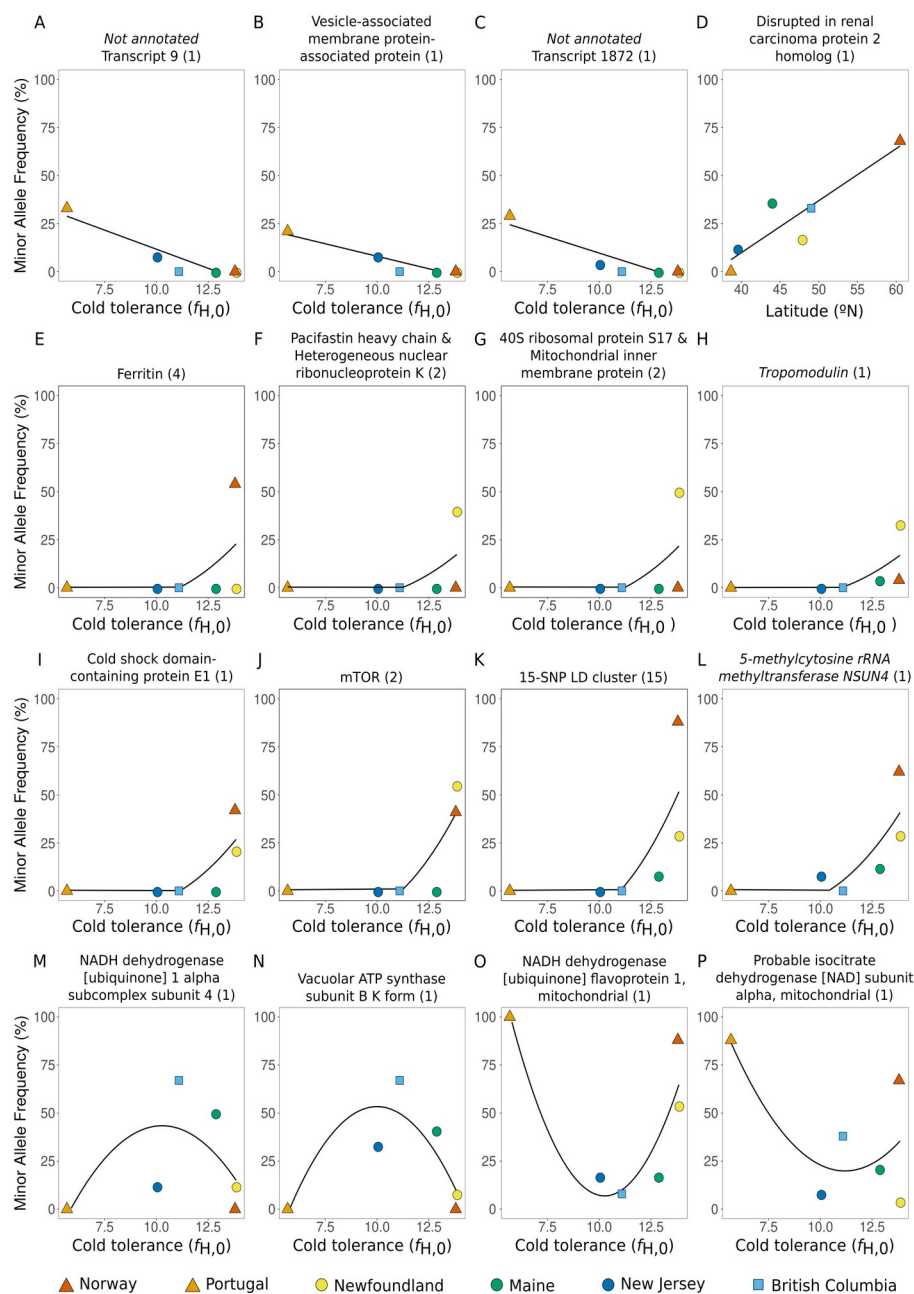

## Supplemental Tables

**Table S1:** Details on the contigs containing outlier SNPs in the 72-SNP linked group. Length is full contig length. Annotations in italics were unannotated or annotated with low confidence (e-value  $> 1 \times 10^{-15}$ ). SNPs are characterized as being in the untranslated region (UTR; defined as outside the longest predicted ORF), or, if in the coding region, as synonymous or non-synonymous.

| Transcript | Annotation                                              | length | UTR | syn | non-syn |
|------------|---------------------------------------------------------|--------|-----|-----|---------|
| 563        | Aspartate aminotransferase                              | 2884   | -   | 2   | -       |
| 787        | Eukaryotic translation initiation factor 3, subunit E   | 10525  | -   | 2   | -       |
| 823        | Uncharacterized peptidase C1-like protein               | 1436   | -   | -   | 3       |
| 1019       | <i>5-methylcytosine rRNA methyltransferase NSUN4</i>    | 2551   | 5   | -   | -       |
| 1070       | <i>Probable rRNA-processing protein EBP2 homolog</i>    | 2202   | -   | 1   | -       |
| 1563       | Tyrosine-protein phosphatase non-receptor type 13       | 2357   | -   | 8   | -       |
| 1626       | Sulfide:quinone oxidoreductase, mitochondrial precursor | 1429   | 1   | 1   | -       |
| 1872       | <i>Not annotated</i>                                    | 2884   | 6   | -   | -       |
| 1881       | <i>Fibrous sheath CABYR-binding protein</i>             | 445    | -   | -   | 2       |
| 1887       | Ubiquitin associated protein 2-like protein             | 1884   | -   | -   | 1       |
| 2059       | Hypoxia-inducible factor alpha                          | 5602   | -   | 1   | 1       |
| 2079       | Lingerer, isoform H                                     | 2939   | 1   | 5   | -       |
| 2113       | Saposin, isoform 1                                      | 3400   | -   | 2   | 1       |
| 2340       | MICOS complex subunit Mic10                             | 3972   | 1   | -   | -       |
| 2456       | Tropomodulin-like isoform 1                             | 1909   | 6   | -   | -       |
| 2807       | Ribonuclease H1                                         | 2296   | 1   | 1   | -       |
| 2873       | pre-mRNA 3'-end-processing factor FIP1-like             | 1928   | -   | 1   | -       |
| 3027       | Thrombospondin                                          | 4777   | -   | 1   | -       |
| 3151       | <i>Not annotated</i>                                    | 466    | -   | -   | 2       |
| 3996       | Cartilage oligomeric matrix protein-like                | 1046   | -   | 1   | -       |
| 4153       | Sulfide:quinone oxidoreductase, mitochondrial           | 764    | 1   | -   | -       |
| 4792       | 39S ribosomal protein L46, mitochondrial                | 467    | -   | 2   | -       |

| <b>Transcript</b> | <b>Annotation</b>                              | <b>length</b> | <b>UTR</b> | <b>syn</b> | <b>non-syn</b> |
|-------------------|------------------------------------------------|---------------|------------|------------|----------------|
| 5199              | <i>Not annotated</i>                           | 1349          | -          | -          | 1              |
| 5774              | NAD-dependent deacetylase sirtuin-5            | 1117          | -          | 2          | -              |
| 6184              | Structural maintenance of chromosome protein 3 | 4240          | -          | 4          | -              |
| 6548              | <i>Neurofilament heavy polypeptide</i>         | 2067          | -          | -          | 1              |
| 7187              | Proliferation-associated protein 2G4           | 2575          | 1          | 2          | -              |
| 11545             | <i>Not annotated</i>                           | 1208          | 1          | -          | -              |

**Table S2:** Details on outlier SNP regions. Correlation gives the r-value for a partial Mantel test for minor allele frequency with temperature (SST), cold tolerance (Cold), heat tolerance (Heat), or location latitude (Lat); neutral pairwise  $F_{ST}$  is used as a covariate to account for population structure. Stars denote significant: \* < 0.05, \*\* < 0.01. Type of SNP gives the number of outlier SNPs in each substitution category based on predicted ORFS. UTR = untranslated region; syn = synonymous substitution; non-synon = non-synonymous substitution.

| Contig                                                                               | Fig. | Annotation                                                           | Correlation              |        |       |       | Type of SNP        |     |         |
|--------------------------------------------------------------------------------------|------|----------------------------------------------------------------------|--------------------------|--------|-------|-------|--------------------|-----|---------|
|                                                                                      |      |                                                                      | SST                      | Cold   | Heat  | Lat   | UTR                | syn | non-syn |
| SNPs associated with temperature or thermal tolerance with BayPass covariate models: |      |                                                                      |                          |        |       |       |                    |     |         |
|                                                                                      | 4A   | 72-SNP linkage disequilibrium cluster                                | 0.82**                   | 0.96** | 0.21  | -0.06 | details in Table 3 |     |         |
|                                                                                      | S3K  | 15-SNP linkage disequilibrium cluster <sup>1,‡</sup>                 | -0.18                    | -0.11  | 0.41  | 0.63  | 11                 | 3   | 1       |
| 9                                                                                    | S3A  | Not annotated <sup>†</sup>                                           | 0.83*                    | 0.89*  | 0.25  | 0.09  | 1                  | -   | -       |
| 325                                                                                  | S3B  | Vesicle-associated membrane protein-associated protein <sup>†</sup>  | 0.83*                    | 0.89*  | 0.25  | 0.09  | -                  | 1   | -       |
| 551                                                                                  | 4B   | Ryanodine receptor                                                   | 0.79*                    | 0.91** | 0.35  | 0.24  | 1                  | 2   | 1       |
| 1580                                                                                 | S3H  | Tropomodulin <sup>†,‡</sup>                                          | 0.30                     | 0.10   | 0.23  | -0.14 | 1                  | -   | -       |
| 1582                                                                                 | 4D   | Muscle M-line assembly protein unc-89                                | 0.80*                    | 0.77*  | 0.13  | 0.08  | -                  | 2   | -       |
| 1872                                                                                 | S3C  | Not annotated <sup>*,†</sup>                                         | 0.83*                    | 0.89*  | 0.25  | 0.09  | 1                  | -   | -       |
| 3029                                                                                 | S3I  | Cold shock domain-containing protein E1                              | only variable in NO & NL |        |       |       | 1                  | -   | -       |
| 3259                                                                                 | S3J  | mTOR                                                                 | only variable in NO & NL |        |       |       | 2                  | -   | -       |
| 5987                                                                                 | 4F   | Probable complex I intermediate-associated protein 30, mitochondrial | 0.38                     | 0.46*  | 0.54* | 0.37  | -                  | 1   | -       |
| 14335                                                                                | S3D  | Disrupted in renal carcinoma protein 2 homolog                       | 0.07                     | 0.05   | 0.09  | 0.73* | -                  | 1   | -       |
| Additional SNPs identified as outliers with BayPass core model:                      |      |                                                                      |                          |        |       |       |                    |     |         |
|                                                                                      | S3E  | 4-SNP Ferritin linkage disequilibrium cluster <sup>2</sup>           | only variable in NO      |        |       |       | 1                  | -   | 3       |
|                                                                                      | S3F  | 2-SNP linkage disequilibrium cluster <sup>3</sup>                    | only variable in NL      |        |       |       | 2                  | -   | -       |
|                                                                                      | S3G  | 2-SNP linkage disequilibrium cluster <sup>4</sup>                    | only variable in NL      |        |       |       | -                  | 2   | -       |
| 466                                                                                  | 4C   | Muscle M-line assembly protein unc-89                                | 0.69                     | 0.79*  | 0.34  | 0.15  | -                  | 1   | -       |

| Contig | Fig. | Annotation                                                           | Correlation   |              |       |       | Type of SNP |     |         |
|--------|------|----------------------------------------------------------------------|---------------|--------------|-------|-------|-------------|-----|---------|
|        |      |                                                                      | SST           | Cold         | Heat  | Lat   | UTR         | syn | non-syn |
| 475    | S3O  | NADH dehydrogenase [ubiquinone] flavoprotein 1, mitochondrial        | <b>0.58*</b>  | <b>0.58*</b> | -0.04 | -0.55 | -           | -   | 1       |
| 505    | S3M  | NADH dehydrogenase [ubiquinone] 1 alpha subcomplex subunit 4         | -0.37         | -0.35        | -0.28 | -0.26 | 1           | -   | -       |
| 732    | S3P  | Probable isocitrate dehydrogenase [NAD] subunit alpha, mitochondrial | 0.47          | 0.32         | -0.22 | -0.07 | -           | 1   | -       |
| 1019   | S3L  | <i>5-methylcytosine rRNA methyltransferase NSUN4<sup>*,‡</sup></i>   | -0.19         | -0.12        | 0.36  | 0.60  | 1           | -   | -       |
| 2059   | 4E   | Hypoxia-inducible factor alpha <sup>*</sup>                          | <b>0.89**</b> | 0.68         | 0.09  | -0.02 | 1           | -   | -       |
| 2214   | S3N  | Vacuolar ATP synthase subunit B K form                               | -0.36         | -0.29        | -0.17 | -0.37 | 1           | -   | -       |

\*SNP is in a contig represented in the 72-SNP LD cluster, but is not part of that LD cluster.

†Minor allele rare - present at <35% in its most common location.

‡Minor allele rare (<15%) in invasive range outside of NL.

<sup>1</sup>Contains contigs 3546 (*Ubiquitin-conjugating enzyme E2 H*: 1 SNP), 4494 (*Not annotated*: 1 SNP), 4794 (*Not annotated*: 10 SNPs), and 6625 (*T-complex protein 11-like protein 1*: 3 SNPs).

<sup>2</sup>Contains contigs 175 (*Ferritin 2*: 3 SNPs) and 856 (*Ferritin 1*: 1 SNP).

<sup>3</sup>Contains contigs 323 (*Pacifastin heavy chain*: 1 SNP) and 1392 (*Heterogeneous nuclear ribonucleoprotein K*: 1 SNP).

<sup>4</sup>Contains contigs 531 (*40S ribosomal protein S17*: 1 SNP) and 3075 (*Mitochondrial inner membrane protein*: 1 SNP).
